# Supplementary material
Source: PubMed Central journal article supplement (PMC8931798)
Supplement: neurintsurg-2021-018484supp001.pdf [file neurintsurg-2021-018484supp001.pdf]

## SUPPLEMENTAL MATERIAL

Supplemental Figure 1: Flow chart showing algorithm used to identify patient cohort

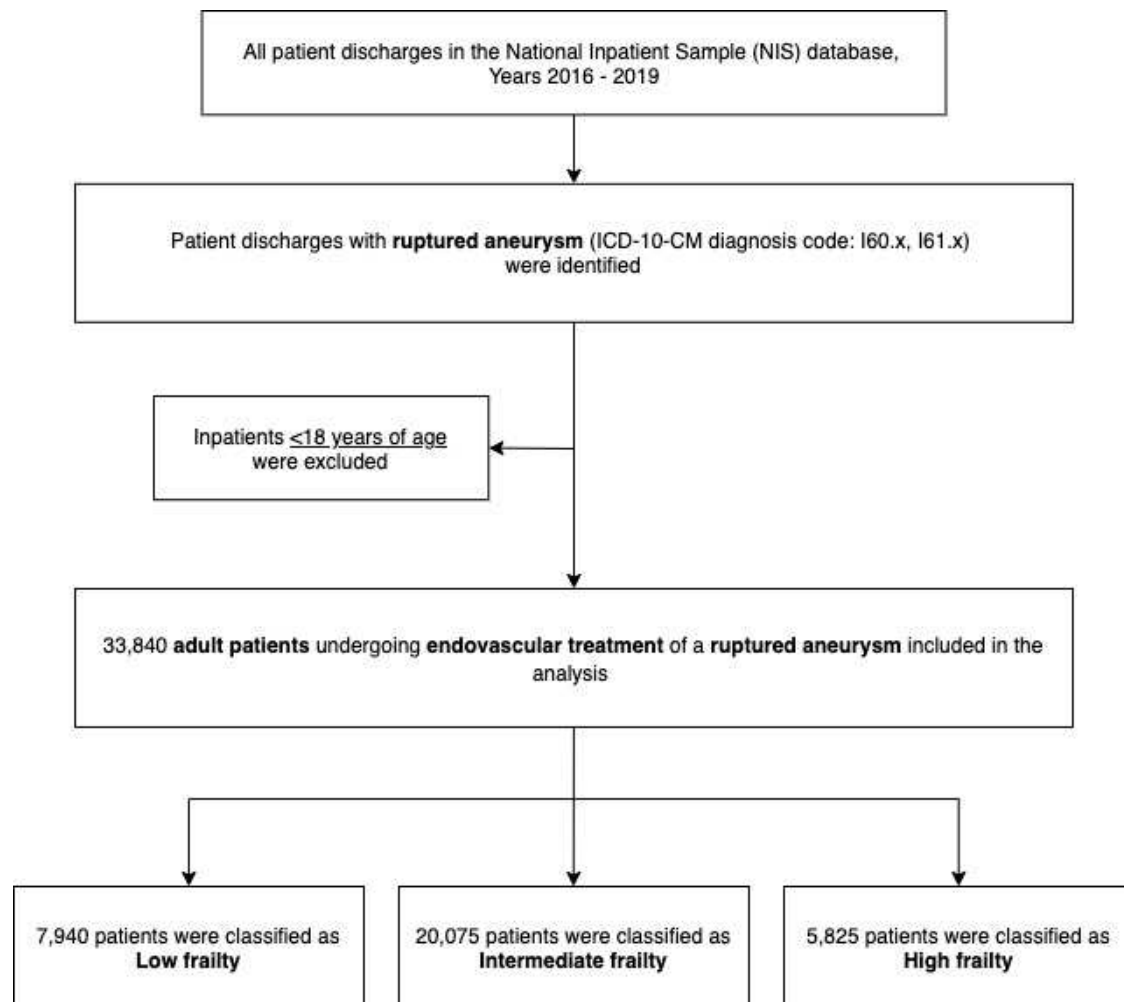

**Supplemental Table 1: ICD-10-CM Diagnostic Codes**

| Variable                                 | ICD-10-CM Code                                                                                              |
|------------------------------------------|-------------------------------------------------------------------------------------------------------------|
| Ruptured aneurysm                        | I60.x, I61.x                                                                                                |
| Seizure                                  | R56.9                                                                                                       |
| Neurological deficit associated with SAH | I69.00, I69.01x, I69.03x, I69.04x, I69.05x, I69.06x, I69.09x                                                |
| Coma                                     | R40.20, R40.243, R40.244                                                                                    |
| Aphasia                                  | R47.01, I69.02, I69.020, I69.022, I69.023, I69.028                                                          |
| Dysphagia                                | R13.1x, I69.021                                                                                             |
| Cranial nerve palsy                      | H49.0x, H49.1x, H49.2x, H49.3x                                                                              |
| Diplopia                                 | H53.2                                                                                                       |
| Hypertensive chronic kidney disease      | I12.x                                                                                                       |
| Personal history of TIA                  | Z86.73                                                                                                      |
| Headache                                 | R51.x                                                                                                       |
| Affective disorder                       | F30.x, F31.x, F32.x, F33.x, F34.x, F39, F41.x                                                               |
| Smoking                                  | F17.210, F17.213, F17.290, F17.293                                                                          |
| Current aspirin use                      | Z79.82                                                                                                      |
| Current anticoagulant use                | Z79.01                                                                                                      |
| Vasospasm                                | I65.x, I66.x, I67.848                                                                                       |
| Hydrocephalus                            | G91.0, G91.1, G91.3, G91.4, G91.8, G91.9                                                                    |
| UTI                                      | N39.0                                                                                                       |
| Post-procedural fever                    | R50.82                                                                                                      |
| Pressure ulcer                           | L89.x                                                                                                       |
| Sepsis                                   | A41.x                                                                                                       |
| Cardiogenic shock                        | R57.0                                                                                                       |
| Cerebral infarction                      | I63.20, I63.21x, I63.22, I63.23x, I63.29, I63.50, I63.51x, I63.52x, I63.53x, I63.54x, I63.8x, I63.9, I67.82 |
| SIADH                                    | E22.2                                                                                                       |
| Hypo-osmolar hyponatremia                | E87.1                                                                                                       |
| Pulmonary embolism                       | I26.x                                                                                                       |
| Phlebitis                                | I80.x                                                                                                       |
| Acute deep vein thrombosis               | I82.210, I82.220, I82.290, I82.4x, I82.6x, I82.A1x, I82.B1x, I82.C1x, I82.890, I82.90                       |
| Periprocedural stroke                    | I97.8x1                                                                                                     |
| Acute myocardial infarction              | I21.0x, I21.1x, I21.2x, I21.3, I21.4, I21.9, I97.191, I97.711                                               |
| Acute respiratory failure                | J81.0, J95.2, J95.82x, J95.831, J96.0x, J96.2x                                                              |
| Acute kidney injury                      | N17.x                                                                                                       |

**Supplemental Table 2: ICD-10-PCS Procedural Codes Included**

| <b>Variable</b>                                | <b>ICD-10-PCS Code</b>                                                                                                                                                             |
|------------------------------------------------|------------------------------------------------------------------------------------------------------------------------------------------------------------------------------------|
| Endovascular treatment                         | 03VG3BZ, 03VG3DZ, 03LG3BZ, 03LG3DZ, 03VK3BZ, 03VK3DZ, 03LK3BZ, 03LK3DZ, 03VL3BZ, 03VL3DZ, 03LL3BZ, 03LL3DZ, 03VP3BZ, 03VP3DZ, 03LP3BZ, 03LP3DZ, 03VQ3BZ, 03VQ3DZ, 03LQ3BZ, 03LQ3DZ |
| External ventricular drain                     | 0W9130Z, 009530Z, 009600Z, 00960ZZ, 009630Z, 009640Z, 00964ZZ                                                                                                                      |
| Ventriculoperitoneal shunt                     | 00163J6, 00160J6, 0W110JG, 0016076                                                                                                                                                 |
| Central venous catheter placement              | 02HV33Z                                                                                                                                                                            |
| Arterial monitoring                            | 4A133B1, 4A133J1, 4A13XB1                                                                                                                                                          |
| Fluoroscopy of cerebral arteries with contrast | B313xZZ, B314xZZ, B315xZZ, B316xZZ, B317xZZ, B318xZZ, B31DxZZ, B31FxZZ, B31GxZZ                                                                                                    |
| Vasospasm treatment                            | 037Gxxx, 037Kxxx, 037Lxxx                                                                                                                                                          |
| Video-EEG monitoring                           | 4A10X4Z                                                                                                                                                                            |
| Mechanical ventilation                         | 09HNxBZ, 0BH13xZ, 5A19xxx                                                                                                                                                          |
| Tracheostomy                                   | 0B11xF4, 0B11xZ4                                                                                                                                                                   |
| Gastrostomy                                    | 0DH6xUZ                                                                                                                                                                            |

**Supplemental Table 3:** Logistic Multivariate Regression Analysis on Prolonged Length of Stay

|                          | Univariate Model            | Multivariate Model          | P - Value |
|--------------------------|-----------------------------|-----------------------------|-----------|
| Frailty Risk Category    |                             |                             |           |
| Low                      | REFERENCE                   |                             |           |
| Intermediate             | <b>6.08 (4.81, 7.68)</b>    | <b>2.38 (1.84, 3.09)</b>    | <0.001    |
| High                     | <b>18.07 (14.03, 23.28)</b> | <b>4.49 (3.36, 6.00)</b>    | <0.001    |
| Age                      | 1.00 (1.00, 1.01)           | <b>0.99 (0.99, 0.99)</b>    | 0.038     |
| Female sex               | 1.01 (0.90, 1.13)           | 0.91 (0.79, 1.04)           | 0.172     |
| Race                     |                             |                             |           |
| White                    | REFERENCE                   |                             |           |
| Black                    | <b>1.32 (1.15, 1.53)</b>    | <b>1.35 (1.13, 1.60)</b>    | <0.001    |
| Hispanic                 | 1.10 (0.93, 1.30)           | 0.99 (0.81, 1.22)           | 0.956     |
| Other                    | 1.24 (1.04, 1.50)           | 1.20 (0.98, 1.48)           | 0.082     |
| Seizure                  | <b>1.46 (1.21, 1.77)</b>    | <i>Removed</i>              | -         |
| Coma                     | <b>1.71 (1.36, 2.17)</b>    | <i>Removed</i>              | -         |
| Aphasia                  | <b>2.45 (2.07, 2.89)</b>    | <b>1.63 (1.32, 2.01)</b>    | <0.001    |
| Dysphagia                | <b>5.49 (4.75, 6.34)</b>    | <b>3.00 (2.55, 3.52)</b>    | <0.001    |
| Diplopia                 | <b>0.32 (0.18, 0.55)</b>    | <b>0.45 (0.25, 0.81)</b>    | 0.008     |
| Smoking                  | <b>0.79 (0.69, 0.91)</b>    | 0.85 (0.72, 1.01)           | 0.059     |
| Headache                 | <b>0.50 (0.36, 0.71)</b>    | 0.72 (0.49, 1.07)           | 0.101     |
| Current aspirin use      | <b>0.70 (0.57, 0.85)</b>    | 0.82 (0.65, 1.04)           | 0.106     |
| Aneurysm Location        |                             |                             |           |
| Anterior                 | REFERENCE                   |                             |           |
| Posterior                | 0.96 (0.83, 1.11)           | 1.02 (0.87, 1.20)           | 0.824     |
| Unspecified              | 0.97 (0.85, 1.11)           | 1.00 (0.85, 1.17)           | 0.954     |
| Number of Adverse Events |                             |                             |           |
| 0                        | REFERENCE                   |                             |           |
| 1                        | <b>5.39 (3.42, 8.50)</b>    | <b>4.20 (2.61, 6.76)</b>    | <0.001    |
| >1                       | <b>37.70 (24.84, 57.24)</b> | <b>19.75 (12.73, 30.65)</b> | <0.001    |

**Supplemental Table 4: Logistic Multivariate Regression Analysis on Increased Cost**

|                                                 | Univariate Model            | Multivariate Model         | P - Value |
|-------------------------------------------------|-----------------------------|----------------------------|-----------|
| Frailty Risk Category                           |                             |                            |           |
| Low                                             | REFERENCE                   |                            |           |
| Intermediate                                    | <b>4.97 (3.96, 6.24)</b>    | <b>2.15 (1.66, 2.77)</b>   | <0.001    |
| High                                            | <b>11.65 (9.04, 15.01)</b>  | <b>3.62 (2.71, 4.83)</b>   | <0.001    |
| Age                                             | 1.00 (0.99, 1.00)           | <b>0.99 (0.98, 0.99)</b>   | 0.003     |
| Female sex                                      | 0.92 (0.82, 1.04)           | <b>0.86 (0.74, 0.99)</b>   | 0.035     |
| Income Quartile                                 |                             |                            |           |
| 0-25 <sup>th</sup>                              | REFERENCE                   |                            |           |
| 26-50 <sup>th</sup>                             | 1.16 (0.99, 1.37)           | <b>1.24 (1.03, 1.49)</b>   | 0.022     |
| 51-75 <sup>th</sup>                             | <b>1.40 (1.19, 1.64)</b>    | <b>1.22 (1.02, 1.47)</b>   | 0.034     |
| 76-100 <sup>th</sup>                            | <b>1.65 (1.39, 1.95)</b>    | <b>1.48 (1.21, 1.82)</b>   | <0.001    |
| Healthcare Coverage                             |                             |                            |           |
| Medicare                                        | REFERENCE                   |                            |           |
| Medicaid                                        | <b>1.33 (1.14, 1.55)</b>    | <b>1.26 (1.01, 1.57)</b>   | 0.044     |
| Private insurance                               | 1.01 (0.89, 1.15)           | 1.15 (0.95, 1.39)          | 0.153     |
| Other                                           | <b>0.66 (0.53, 0.83)</b>    | 0.78 (0.59, 1.03)          | 0.082     |
| Race                                            |                             |                            |           |
| White                                           | REFERENCE                   |                            |           |
| Black                                           | 1.03 (0.89, 1.21)           | 1.18 (0.98, 1.42)          | 0.076     |
| Hispanic                                        | <b>1.33 (1.11, 1.58)</b>    | 1.04 (0.84, 1.28)          | 0.727     |
| Other                                           | <b>1.44 (1.19, 1.73)</b>    | 1.09 (0.87, 1.36)          | 0.457     |
| Hospital Region                                 |                             |                            |           |
| Northeast                                       | REFERENCE                   |                            |           |
| Midwest                                         | <b>0.60 (0.48, 0.74)</b>    | <b>0.53 (0.41, 0.69)</b>   | <0.001    |
| South                                           | <b>0.53 (0.44, 0.64)</b>    | <b>0.51 (0.40, 0.64)</b>   | <0.001    |
| West                                            | <b>1.60 (1.31, 1.95)</b>    | <b>1.64 (1.28, 2.09)</b>   | <0.001    |
| Seizure                                         | <b>1.56 (1.29, 1.89)</b>    | <i>Removed</i>             | -         |
| Coma                                            | <b>2.35 (1.87, 2.97)</b>    | <i>Removed</i>             | -         |
| Aphasia                                         | <b>2.01 (1.69, 2.39)</b>    | <b>1.35 (1.09, 1.66)</b>   | 0.005     |
| Dysphagia                                       | <b>3.38 (2.92, 3.91)</b>    | <b>2.04 (1.72, 2.41)</b>   | <0.001    |
| Diplopia                                        | <b>0.37 (0.22, 0.62)</b>    | <b>0.55 (0.31, 0.96)</b>   | 0.034     |
| Smoking                                         | <b>0.75 (0.65, 0.86)</b>    | <i>Removed</i>             | -         |
| Personal history of a transient ischemic attack | <b>0.73 (0.53, 1.01)</b>    | <i>Removed</i>             | -         |
| Headache                                        | <b>0.40 (0.27, 0.61)</b>    | <b>0.51 (0.32, 0.83)</b>   | 0.006     |
| Aneurysm Location                               |                             |                            |           |
| Anterior                                        | REFERENCE                   |                            |           |
| Posterior                                       | 0.98 (0.85, 1.13)           | 1.05 (0.89, 1.23)          | 0.587     |
| Unspecified                                     | 1.05 (0.91, 1.21)           | 1.10 (0.93, 1.30)          | 0.254     |
| Number of Adverse Events                        |                             |                            |           |
| 0                                               | REFERENCE                   |                            |           |
| 1                                               | <b>3.42 (2.32, 5.03)</b>    | <b>2.81 (1.87, 4.24)</b>   | <0.001    |
| >1                                              | <b>22.32 (15.97, 31.20)</b> | <b>14.40 (9.99, 20.73)</b> | <0.001    |

**Supplemental Table 5:** Logistic Multivariate Regression Analysis on Non-Routine Discharge Disposition

|                          | Univariate Model            | Multivariate Model       | P - Value |
|--------------------------|-----------------------------|--------------------------|-----------|
| Frailty Risk Category    |                             |                          |           |
| Low                      | REFERENCE                   |                          |           |
| Intermediate             | <b>4.83 (4.16, 5.61)</b>    | <b>2.13 (1.79, 2.55)</b> | <0.001    |
| High                     | <b>15.37 (12.51, 18.90)</b> | <b>4.17 (3.26, 5.33)</b> | <0.001    |
| Age                      | <b>1.05 (1.04, 1.05)</b>    | <b>1.04 (1.03, 1.05)</b> | <0.001    |
| Female sex               | 1.08 (0.97, 1.21)           | <b>0.76 (0.65, 0.88)</b> | <0.001    |
| Income Quartile          |                             |                          |           |
| 0-25 <sup>th</sup>       | REFERENCE                   |                          |           |
| 26-50 <sup>th</sup>      | 0.99 (0.86, 1.14)           | <i>Removed</i>           | -         |
| 51-75 <sup>th</sup>      | 1.12 (0.98, 1.29)           | <i>Removed</i>           | -         |
| 76-100 <sup>th</sup>     | <b>1.17 (1.01, 1.35)</b>    | <i>Removed</i>           | -         |
| Healthcare Coverage      |                             |                          |           |
| Medicare                 | REFERENCE                   |                          |           |
| Medicaid                 | <b>0.29 (0.25, 0.34)</b>    | <b>0.49 (0.38, 0.63)</b> | <0.001    |
| Private insurance        | <b>0.32 (0.28, 0.36)</b>    | <b>0.55 (0.45, 0.67)</b> | <0.001    |
| Other                    | <b>0.16 (0.13, 0.19)</b>    | <b>0.28 (0.20, 0.37)</b> | <0.001    |
| Race                     |                             |                          |           |
| White                    | REFERENCE                   |                          |           |
| Black                    | 0.88 (0.77, 1.01)           | 1.06 (0.88, 1.27)        | 0.535     |
| Hispanic                 | <b>0.72 (0.62, 0.84)</b>    | <b>0.76 (0.62, 0.93)</b> | 0.009     |
| Other                    | 0.98 (0.81, 1.18)           | 0.94 (0.74, 1.19)        | 0.592     |
| Hospital Region          |                             |                          |           |
| Northeast                | REFERENCE                   |                          |           |
| Midwest                  | 0.86 (0.73, 1.01)           | <b>0.76 (0.61, 0.95)</b> | 0.016     |
| South                    | <b>0.66 (0.57, 0.76)</b>    | <b>0.59 (0.49, 0.72)</b> | <0.001    |
| West                     | 0.80 (0.67, 0.95)           | <b>0.67 (0.53, 0.84)</b> | <0.001    |
| Seizure                  | <b>1.61 (1.33, 1.96)</b>    | <i>Removed</i>           | -         |
| Coma                     | <b>5.89 (3.96, 8.77)</b>    | <b>2.57 (1.62, 4.09)</b> | <0.001    |
| Aphasia                  | <b>3.03 (2.54, 3.62)</b>    | <b>1.68 (1.35, 2.11)</b> | <0.001    |
| Dysphagia                | <b>8.52 (7.06, 10.28)</b>   | <b>3.95 (3.20, 4.87)</b> | <0.001    |
| Diplopia                 | <b>0.54 (0.31, 0.91)</b>    | 0.63 (0.39, 1.01)        | 0.057     |
| Smoking                  | <b>0.65 (0.57, 0.73)</b>    | <b>0.77 (0.65, 0.90)</b> | <0.001    |
| Headache                 | <b>0.38 (0.29, 0.50)</b>    | <b>0.50 (0.34, 0.73)</b> | <0.001    |
| Aneurysm Location        |                             |                          |           |
| Anterior                 | REFERENCE                   |                          |           |
| Posterior                | 0.90 (0.79, 1.01)           | 0.85 (0.72, 0.99)        | 0.041     |
| Unspecified              | <b>1.13 (1.01, 1.28)</b>    | <b>1.30 (1.11, 1.53)</b> | <0.001    |
| Number of Adverse Events |                             |                          |           |
| 0                        | REFERENCE                   |                          |           |
| 1                        | <b>2.06 (1.71, 2.48)</b>    | <b>1.89 (1.52, 2.36)</b> | <0.001    |
| >1                       | <b>9.80 (8.39, 11.45)</b>   | <b>6.74 (5.55, 8.18)</b> | <0.001    |
